# Supplementary material for: PLLA–gelatin composite fiber membranes incorporated with functionalized CeNPs as a sustainable wound dressing substitute promoting skin regeneration and scar remodeling
Source: Royal Society of Chemistry journal article supplement (doi:10.1039/d1tb02677a), 2022-01-01
Supplement: d1tb02677a1.pdf [file d1tb02677a1.pdf]

1 PLLA-gelatin composite fiber membranes incorporated with  
2 functionalized CeNPs as a sustainable wound dressing substitute  
3 promoting skin regeneration and scar remodeling

4 Yarong Lv<sup>a</sup>, Yulong Xu<sup>a</sup>, Xinyu Sang<sup>a</sup>, Chenxi Li<sup>a</sup>, Yong Liu<sup>a,\*</sup>, Quanyi Guo<sup>b,\*</sup>, Seeram  
5 Ramakrishna<sup>c</sup>, Ce Wang<sup>d</sup>, Ping Hu<sup>e</sup>, Himansu Sekhar Nanda<sup>f,g,\*</sup>

6 <sup>a</sup> Beijing Key Laboratory of Advanced Functional Polymer Composites, College of  
7 Material Science and Engineering, Beijing University of Chemical Technology, Beijing  
8 100029, China

9 <sup>b</sup> Institute of Orthopedics, the Fourth Medical Center, Beijing Key Laboratory of  
10 Regenerative Medicine in Orthopedics, Chinese PLA General Hospital, Beijing 100853,  
11 China

12 <sup>c</sup> Centre for Nanofibers and Nanotechnology, Department of Mechanical Engineering,  
13 National University of Singapore, Singapore 117575, Singapore

14 <sup>d</sup> Alan G. MacDiarmid Institute, Jilin University, Changchun, Jilin 130012, China.

15 <sup>e</sup> Department of Chemical Engineering, Tsinghua University, Beijing 100084, China

16 <sup>f</sup> Biomedical Engineering and Technology Laboratory, Discipline of Mechanical  
17 Engineering, PDPM-Indian Institute of Information Technology Design and  
18 Manufacturing (IIITDM) Jabalpur, Dumna Airport Road, Jabalpur-482005, MP, India

19 <sup>g</sup> International Centre for Sustainable and Net Zero Technologies, Discipline of  
20 Mechanical Engineering, PDPM-Indian Institute of Information Technology Design and  
21 Manufacturing (IIITDM) Jabalpur, Dumna Airport Road, Jabalpur-482005, MP, India

22

23

24 \* Correspondence: Prof. Yong Liu (Y.L.); [yongliu@mail.buct.edu.cn](mailto:yongliu@mail.buct.edu.cn), Dr. Quanyi  
25 Guo (Q.Y.G); [doctorguo\\_301@163.com](mailto:doctorguo_301@163.com) and Himansu Sekhar Nanda (H.S.N);  
26 [himansu@iiitdmj.ac.in](mailto:himansu@iiitdmj.ac.in)

27 Tel.: +91-761-2794-429 (H.S.N.); +86-135-2100-8075 (Y.L.); +861-5810335479  
28 (Q.Y.G)

29

30

31 **The electrospinning parameters**

32 The electrospinning parameters for the production of fiber membranes were shown  
33 in **Table S1**.

34 **Table S1.** Electrospinning parameters

| Polymer concentration | Positive voltage (nozzle) | Negative voltage (collector) | Flow rate | Distance between tip and collector | Temperature |
|-----------------------|---------------------------|------------------------------|-----------|------------------------------------|-------------|
| 6 wt%                 | +3.5 kV                   | -6 kV                        | 0.8 ml/h  | 20 cm                              | room        |

35

36 **Crosslinking**

37 The fibers membrane was cross-linked with 50 mM 1-(3-Dimethylaminopropyl)-N-  
38 ethyl carbodiimide hydrochloride (EDC, Shanghai Macklin Biochemical Co. Ltd) and 20  
39 mM N-Hydroxysuccinimide (NHS, Shanghai Macklin Biochemical Co. Ltd) in 90% (v/v)  
40 ethanol for 12 h at room temperature. After three times washing, the fibers  
41 membrane was placed in a vacuum drying oven (ZF-6020, Shanghai Jiecheng  
42 Experimental Instrument Co., Ltd.) for 24 h to dry again. The final fibers membrane  
43 was sealed for use. The parameters of crosslinking process were shown in **Table S2**.

44

45 **Table S2.** Cross-linking process parameters

| <b>Crosslinker</b> |       | <b>Solvents</b> |                 | <b>Reaction conditions</b> |      |
|--------------------|-------|-----------------|-----------------|----------------------------|------|
| EDS                | NHS   | Ethanol         | Deionized water | Temperature                | Time |
| 50 mM              | 20 mM | 90% (V/V)       | 10% (V/V)       | RT                         | 12 h |

46

47 **FTIR and XRD analysis**

48 FTIR analysis and XRD pattern for gelatin powder, uncrosslinked, and crosslinked fibers  
49 are shown in Figure S1

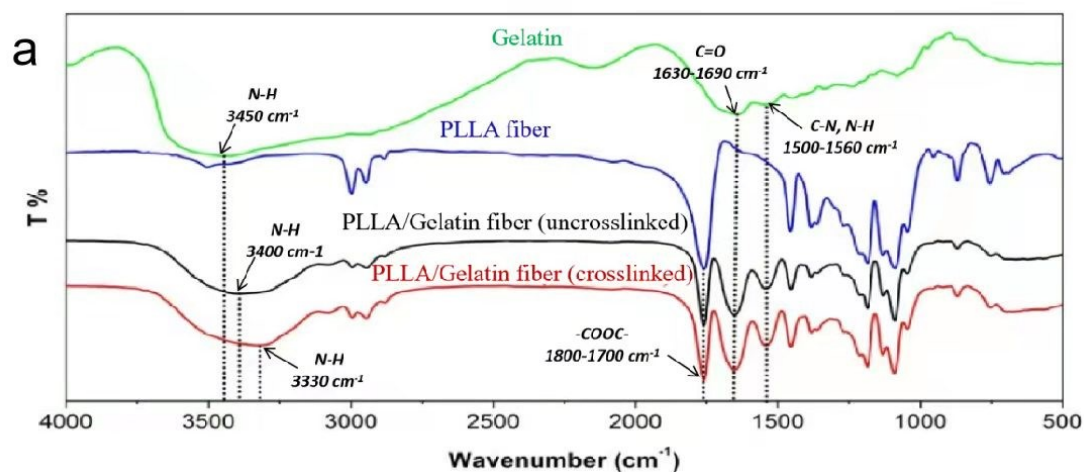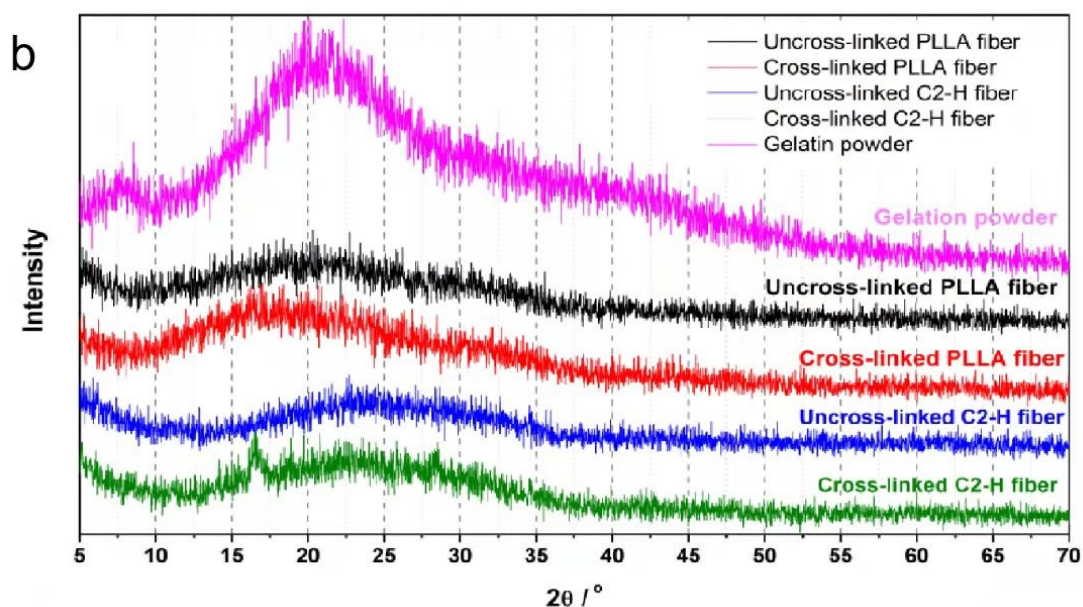

50

51 **Fig. S1** FTIR spectra (a) and XRD pattern (b) of Gelatin powder, A2, uncrosslinked and  
 52 crosslinked C2-H fibers

53

54 **Degradation properties**

55

**Table S3.** Details of conditions for degradation experiment

| Mat size  | PBS   | Temperature | Rotating speed | container              |
|-----------|-------|-------------|----------------|------------------------|
| 2 cm×2 cm | 50 ml | 37°C        | 100 rpm        | 50 ml erlenmeyer flask |

56

57

**Table S4.** Degradation rate of cross-linked fibers

|   | C2-H     |          | C2-M     |         | C2-Z     |          | A2       |          |
|---|----------|----------|----------|---------|----------|----------|----------|----------|
|   | Average  | SD       | Average  | SD      | Average  | SD       | Average  | SD       |
| 0 | 0        | 0        | 0        | 0       | 0        | 0        | 0        | 0        |
| 1 | 2.501563 | 0.088444 | 8.278437 | 0.43467 | 2.787046 | 0.409949 | 0.093052 | 0.131596 |

---

|   |          |          |          |          |          |          |          |          |
|---|----------|----------|----------|----------|----------|----------|----------|----------|
| 3 | 10.33849 | 1.475903 | 37.13878 | 4.524614 | 17.49815 | 0.027606 | 5.409641 | 0.713241 |
|---|----------|----------|----------|----------|----------|----------|----------|----------|

---
